# Supplementary material
Source: HighWire-hosted journal article supplement (https://ijgc.bmj.com/content/31/5/702)

**Table S1: Patterns of failures within the first 3 years following surgery for women with stage IIIc endometrial cancer who received chemotherapy before radiation**

| Type of failure within the first 3 years, N    | All patients<br>(N=102) | Sandwich <sup>a</sup><br>(N=18) | Chemotherapy-first <sup>b</sup><br>(N=84) |
|------------------------------------------------|-------------------------|---------------------------------|-------------------------------------------|
| Distant only                                   |                         |                                 |                                           |
| Hematogenous or peritoneal                     | 18                      | 4                               | 14                                        |
| Hematogenous or peritoneal + other lymphatic   | 6                       | 2                               | 4                                         |
| Distant (hematogenous or peritoneal) + vaginal | 2                       | 1                               | 1                                         |
| Isolated pelvic                                | 1                       | 0                               | 1                                         |
| Isolated vaginal                               | 3                       | 1                               | 2                                         |
| Para-aortic and other lymphatic                | 1                       | 0                               | 1                                         |
| Total <sup>c</sup>                             | 31                      | 8                               | 23                                        |

<sup>a</sup> Sandwich: Planned 3 cycles of chemotherapy followed by radiation and then 3 more cycles of chemotherapy

<sup>b</sup> Chemotherapy-first: Planned 6 cycles of chemotherapy followed by radiation

<sup>c</sup> An additional 8 patients had their first documented recurrence more than 3 years following surgery: 1 isolated distant following sandwich therapy, 6 isolated distant following chemotherapy-first approach, and 1 isolated other lymphatic following chemotherapy-first approach.

**Table S2: Sequencing of adjuvant treatment and chemotherapy delivery in endometrial cancer trials**

| Author, Study name                         | Trial phase | N   | Chemotherapy regimen used                                                                                                                                                                                                          | Planned number of chemotherapy cycles | Women completing 4 cycles of chemotherapy (%) |
|--------------------------------------------|-------------|-----|------------------------------------------------------------------------------------------------------------------------------------------------------------------------------------------------------------------------------------|---------------------------------------|-----------------------------------------------|
| <b>RT before CT</b>                        |             |     |                                                                                                                                                                                                                                    |                                       |                                               |
| Greven 2004 [10]<br>RTOG-9708              | II          | 46  | Cisplatin 50 mg/m <sup>2</sup> D1& 28 with RT f/b cisplatin 50 mg/m <sup>2</sup> and paclitaxel (175 mg/m <sup>2</sup> ) at 4-week intervals                                                                                       | 4                                     | 76%                                           |
| Hogberg 2010 [8]<br>NSGO-9501/ EORTC-55991 | III         | 187 | Most women received oxorubicin/epirubicin 50mg/m <sup>2</sup> + Cisplatin 50 mg/m <sup>2</sup> , 4 weekly after RT. Other regimens allowed                                                                                         | 4                                     | 73%                                           |
| Jhingran 2013 [11]                         | II          | 32  | Paclitaxel 50 mg/m <sup>2</sup> on days 1, 8, 15, 22, &29 during RT, f/b 4 courses of paclitaxel 135 mg/m <sup>2</sup> 3 weekly                                                                                                    | 4                                     | 77%                                           |
| Viswanathan 2015 [12]<br>RTOG-0921         | II          | 34  | Cisplatin on D 1 and 29 and bevacizumab (5 mg/kg) on D 1, 15 and 29 of RT. f/b carboplatin (AUC 5) and paclitaxel (135 mg/m <sup>2</sup> ).                                                                                        | 4                                     | 90%                                           |
| Ren 2016 [13]                              | II          | 122 | Cisplatin 50 mg/m <sup>2</sup> on D 1 & 28 of RT. Paclitaxel 135 mg/m <sup>2</sup> and carboplatin AUC=5 or cisplatin 50 mg/m <sup>2</sup> , cyclophosphamide 600 mg/m <sup>2</sup> and epirubicin 60 mg/m <sup>2</sup> , 3 weekly | 4                                     | 86.6%                                         |
| Boer 2018 [4]<br>PORTEC-3                  | III         | 330 | Cisplatin 50mg/m <sup>2</sup> in week 1 and 4 of RT, f/b paclitaxel 175 + carboplatin AUC 5, 3 weekly                                                                                                                              | 4                                     | 71%                                           |
| Matei 2019 [3]<br>GOG-258 (CT+RT arm)      | III         | 346 | Cisplatin 50mg/m <sup>2</sup> , D1 & 29 with RT, f/b carboplatin (AUC 5-6) & paclitaxel 175 mg/m <sup>2</sup> , 3 weekly                                                                                                           | 4                                     | 75%                                           |
| <b>CT before RT</b>                        |             |     |                                                                                                                                                                                                                                    |                                       |                                               |
| Geller 2007 [14]                           | II          | 42  | 3 cycles of docetaxel (75 mg/m <sup>2</sup> ) and carboplatin (AUC 6) 3 weekly f/b RT, then 3 additional cycles                                                                                                                    | 6                                     | 85% completed 6 planned cycles                |
| Hogberg 2010 [8]<br>MaNGO ILIADE-III       | III         | 80  | Doxorubicin 60 mg/m <sup>2</sup> and cisplatin 50 mg/m <sup>2</sup> 3 weekly f/b RT                                                                                                                                                | 3                                     | 89% completed 3 planned cycles                |
| Scribner 2012 [15]                         | II          | 45  | Docetaxel 75 mg/m <sup>2</sup> & carboplatin (AUC 6), 3 weekly f/b RT                                                                                                                                                              | 6                                     | 73.3% completed 6 planned cycles              |
| Mustea 2013 [9]<br>NOGGO                   | II          | 35  | Paclitaxel 175 mg/m <sup>2</sup> and carboplatin AUC5, 3 weekly and subsequent RT                                                                                                                                                  | 4                                     | 100%                                          |
| Matei 2019 [3]<br>GOG 258 (CT arm)         | III         | 361 | Carboplatin (AUC 6) & paclitaxel 175 mg/m <sup>2</sup> , 3 weekly                                                                                                                                                                  | 6                                     | 92.1%                                         |

Abbreviations: AUC, area under the curve; CT, chemotherapy; RT, radiotherapy; CT+RT, combined chemotherapy and radiotherapy

**Figure S1: Cumulative incidence of recurrence by treatment group among women who received chemotherapy before radiation for stage IIIC endometrial cancer. A) Vaginal recurrences, B) Non-vaginal locoregional recurrences, and C) Distant recurrences**

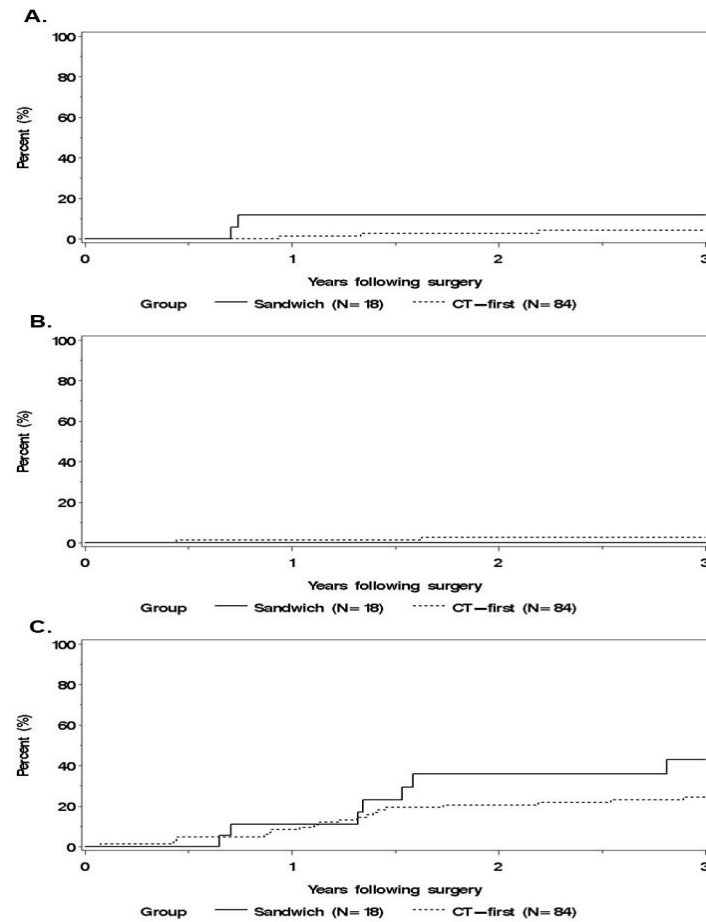

**Figure S2: Impact of sequencing of chemotherapy and radiotherapy on chemotherapy delivery in endometrial cancer trials: chemotherapy before radiotherapy (CT before RT) vs radiotherapy before chemotherapy (RT before CT)**

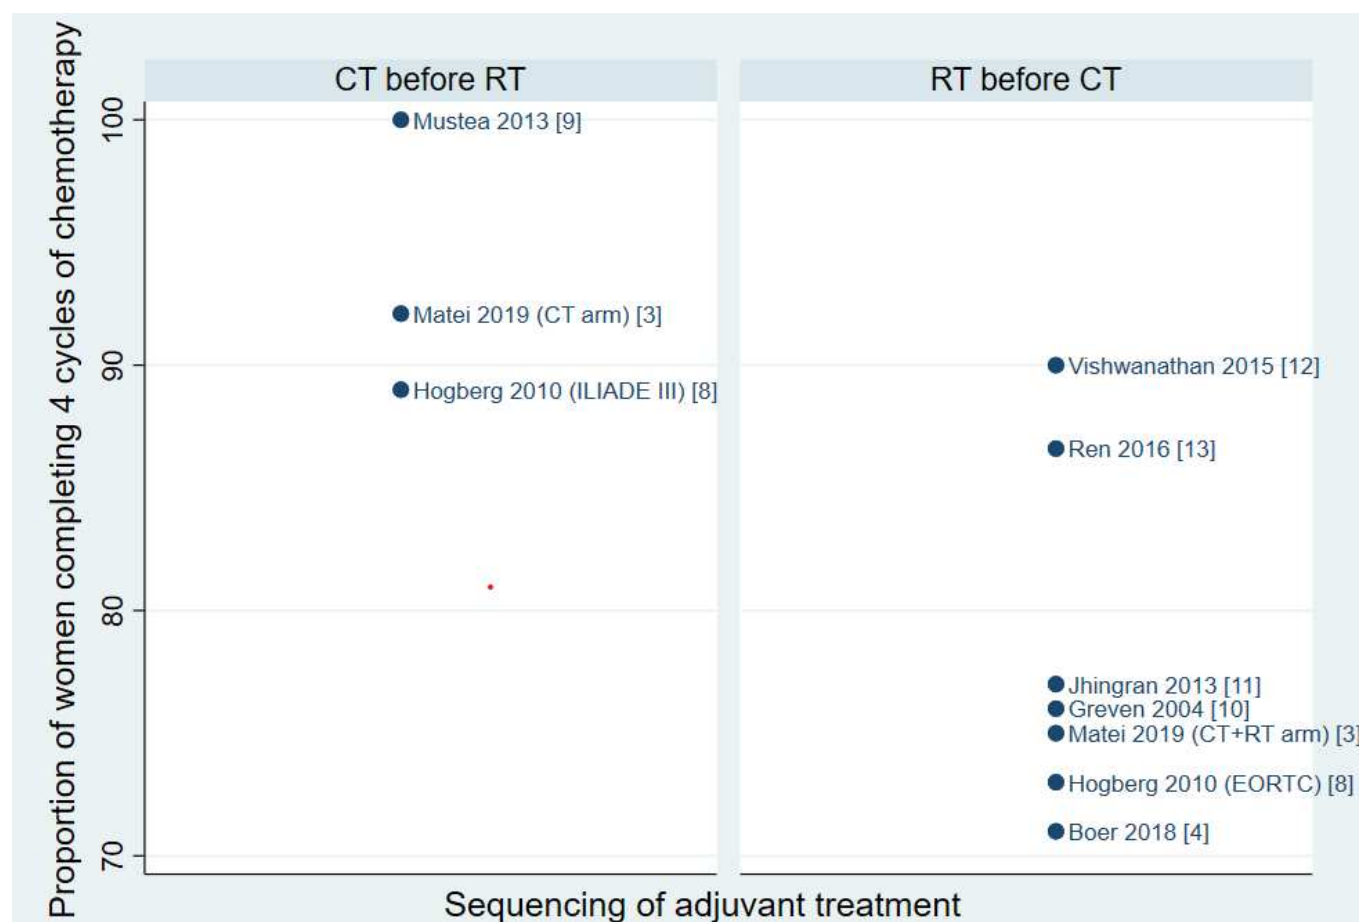

Supplement: inline-supplementary-material-1 [file inline-supplementary-material-1.pdf]
